# Supplementary material
Source: HighWire-hosted journal article supplement (https://www.ajevonline.org/highwire/filestream/12476/field_highwire_adjunct_files/0/SupplementalData.pdf)
Supplement: SupplementalData.pdf [file SupplementalData.pdf]

**Supplemental Data for:**

Lan Y, Wang J, Aubie E, Crombleholme M and Reynolds A. 2022. Effects of frozen materials other than grapes on red wine aroma compounds. Impacts of harvest technologies. *Am J Enol Vitic* 73:134-146. doi: 10.5344/ajev.2022.22006

**Supplemental Table 1** Effect of harvest technology on Ontario Cabernet franc aroma compounds, 2017. Concentrations are in µg/L unless otherwise specified.

| Esters                                                |                       |                        |                      |                 |                 |                            |                   |                 |               |                     |                   |                  |
|-------------------------------------------------------|-----------------------|------------------------|----------------------|-----------------|-----------------|----------------------------|-------------------|-----------------|---------------|---------------------|-------------------|------------------|
| Harvest technology <sup>a</sup>                       | Ethyl isobutyrate     | Ethyl hexanoate        | Ethyl heptanoate     | Ethyl octanoate | Ethyl nonanoate | Ethyl decanoate            | Isobutyl acetate  | Isoamyl acetate | Hexyl acetate | Phenylethyl acetate | Isoamyl hexanoate |                  |
| HH                                                    | 492.55 b <sup>b</sup> | 968.00 a               | 8.37                 | 625.26          | 2.05 b          | 176.71                     | 90.80             | 1353.16         | 15.66         | 75.30               | 1.220 a           |                  |
| MECH                                                  | 499.07 ab             | 549.74 b               | 5.78                 | 296.96          | 8.76 a          | 81.34                      | 75.76             | 856.86          | 6.18          | 40.62               | 0.345 b           |                  |
| MECH+BLR                                              | 457.82 b              | 540.38 b               | 10.02                | 387.16          | 10.37 a         | 104.27                     | 68.49             | 914.09          | 4.17          | 41.60               | 0.487 b           |                  |
| OPTI                                                  | 964.47 a              | 962.96 a               | 7.51                 | 609.76          | 10.49 a         | 163.91                     | 96.06             | 1439.53         | 10.58         | 59.10               | 0.533 b           |                  |
| MECH+OS                                               | 862.76 ab             | 782.29 ab              | 7.17                 | 483.12          | 11.86 a         | 138.74                     | 111.45            | 1249.56         | 9.34          | 67.09               | 0.545 b           |                  |
| Pr > F                                                | 0.019                 | 0.042                  | 0.251                | 0.143           | <0.0001         | 0.137                      | 0.191             | 0.127           | 0.069         | 0.128               | 0.002             |                  |
| Significance                                          | * <sup>c</sup>        | *                      | NS                   | NS              | ****            | NS                         | NS                | NS              | NS            | NS                  | **                |                  |
| Alcohols, norisoprenoids, and miscellaneous compounds |                       |                        |                      |                 |                 |                            |                   |                 |               |                     |                   |                  |
| Harvest technology                                    | Isobutanol (mg/L)     | Isoamyl alcohol (mg/L) | Hexanol              | Heptanol        | Octanol         | Phenylethyl alcohol (mg/L) | Diethyl succinate | β-Damascenone   | α-Ionone      | β-Ionone            | Methyl salicylate | Ethyl salicylate |
| HH                                                    | 534.82                | 1444.51                | 8511.55              | 160.53          | 44.47           | 183.69                     | 21 333.77         | 21.66           | 0.767 a       | 0.603 a             | 33.42             | 1.257            |
| MECH                                                  | 707.72                | 1410.76                | 8109.69              | 124.74          | 31.69           | 145.42                     | 22 558.73         | 10.56           | 0.490 b       | 0.315 a             | 22.00             | 0.850            |
| MECH+BLR                                              | 601.57                | 1420.48                | 8047.78              | 216.39          | 43.54           | 164.97                     | 27 466.93         | 10.47           | 0.523 b       | 0.333 a             | 26.25             | 1.517            |
| OPTI                                                  | 806.55                | 1740.67                | 9417.07              | 163.29          | 39.98           | 173.13                     | 27 244.50         | 19.56           | 0.830 a       | 0.440 a             | 20.83             | 0.593            |
| MECH+OS                                               | 934.52                | 1687.57                | 11 591.44            | 169.89          | 42.63           | 196.54                     | 29 029.69         | 17.49           | 0.785 a       | 0.525 a             | 23.70             | 0.790            |
| Pr > F                                                | 0.306                 | 0.596                  | 0.112                | 0.114           | 0.672           | 0.559                      | 0.653             | 0.069           | 0.036         | 0.070               | 0.628             | 0.287            |
| Significance                                          | NS                    | NS                     | NS                   | NS              | NS              | NS                         | NS                | NS              | *             | NS                  | NS                | NS               |
| Terpenes                                              |                       |                        |                      |                 |                 |                            |                   |                 |               |                     |                   |                  |
| Harvest technology                                    | Linalool              | cis-Linalool oxide     | trans-Linalool oxide | Geraniol        | Nerol           | Nerolidol                  | Nerol oxide       | Citronellol     | α-Citral      | β-Citral            | cis-Rose oxide    | trans-Rose oxide |
| HH                                                    | 10.63                 | 3.00 c                 | 0.517 c              | 43.67           | 7.58            | 0.593                      | 0.307             | 14.95           | 4.23          | 0.000 b             | 0.267 b           | 0.040 b          |
| MECH                                                  | 5.22                  | 3.36 c                 | 16.89 ab             | 20.03           | 3.89            | 0.305                      | 0.315             | 6.44            | 1.89          | 0.530 b             | 0.285 b           | 0.095 ab         |
| MECH+BLR                                              | 7.45                  | 14.97 a                | 22.01 ab             | 25.60           | 4.89            | 0.290                      | 0.440             | 7.74            | 2.96          | 1.543 a             | 0.560 a           | 0.147 a          |
| OPTI                                                  | 9.45                  | 5.45 bc                | 25.89 a              | 25.51           | 3.96            | 0.117                      | 0.293             | 9.91            | 2.49          | 0.000 b             | 0.157 b           | 0.043 b          |
| MECH+OS                                               | 8.50                  | 8.18 b                 | 12.99 bc             | 30.89           | 5.44            | 0.315                      | 0.430             | 11.26           | 3.22          | 0.635 ab            | 0.245 b           | 0.080 ab         |
| Pr > F                                                | 0.105                 | < 0.0001               | <0.0001              | 0.260           | 0.644           | 0.434                      | 0.153             | 0.117           | 0.242         | 0.002               | 0.002             | 0.020            |
| Significance                                          | NS                    | ****                   | ****                 | NS              | NS              | NS                         | NS                | NS              | NS            | **                  | **                | *                |
| Harvest technology                                    | α-Terpineol           | Terpinolene            | γ-Terpinene          | Limonene        | Myrcene         | Eugenol                    |                   |                 |               |                     |                   |                  |
| HH                                                    | 20.79                 | 0.120                  | 0.020                | 0.513           | 1.11            | 4.49                       |                   |                 |               |                     |                   |                  |
| MECH                                                  | 17.23                 | 0.085                  | 0.000                | 0.420           | 1.22            | 2.76                       |                   |                 |               |                     |                   |                  |
| MECH+BLR                                              | 21.91                 | 0.093                  | 0.010                | 0.473           | 1.78            | 4.16                       |                   |                 |               |                     |                   |                  |
| OPTI                                                  | 20.53                 | 0.127                  | 0.043                | 0.627           | 2.34            | 3.16                       |                   |                 |               |                     |                   |                  |
| MECH+OS                                               | 21.89                 | 0.115                  | 0.010                | 0.475           | 2.43            | 3.89                       |                   |                 |               |                     |                   |                  |
| Pr > F                                                | 0.782                 | 0.349                  | 0.205                | 0.617           | 0.445           | 0.232                      |                   |                 |               |                     |                   |                  |
| Significance                                          | NS                    | NS                     | NS                   | NS              | NS              | NS                         |                   |                 |               |                     |                   |                  |

<sup>a</sup>HH, hand harvest; MECH, mechanical harvest; MECH+BLR, mechanical harvest plus preharvest full canopy leaf removal; OPTI, mechanically harvested using a Braud-New Holland optical sorting harvester; MECH+OS, mechanical harvest plus in-winery optical sorting.

<sup>b</sup>Means followed by different letters are significantly different at  $p < 0.05$ , Duncan's multiple range test.

<sup>c</sup>\*, \*\*, \*\*\*\*, NS: significant at  $p < 0.05$ , 0.01, 0.0001, or not significant, respectively.

**Supplemental Data for:**

Lan Y, Wang J, Aubie E, Crombleholme M and Reynolds A. 2022. Effects of frozen materials other than grapes on red wine aroma compounds. Impacts of harvest technologies. *Am J Enol Vitic* 73:134-146. doi: 10.5344/ajev.2022.22006

**Supplemental Table 2** Effect of harvest technology on Ontario Cabernet franc aroma compounds, 2018. Concentrations are in µg/L unless otherwise specified.

| Esters                                                |                   |                        |                      |                 |                 |                            |                          |                          |                          |                     |                   |                  |
|-------------------------------------------------------|-------------------|------------------------|----------------------|-----------------|-----------------|----------------------------|--------------------------|--------------------------|--------------------------|---------------------|-------------------|------------------|
| Harvest technology <sup>a</sup>                       | Ethyl isobutyrate | Ethyl hexanoate        | Ethyl heptanoate     | Ethyl octanoate | Ethyl nonanoate | Ethyl decanoate            | Isobutyl acetate         | Isoamyl acetate          | Hexyl acetate            | Phenylethyl acetate | Isoamyl hexanoate |                  |
| HH                                                    | 161.80            | 282.88                 | 7.24                 | 187.68          | 2.05            | 42.66                      | 322.67 a <sup>b</sup>    | 802.95                   | 2.51                     | 42.98               | 0.420 ab          |                  |
| MECH                                                  | 135.59            | 289.02                 | 7.42                 | 187.64          | 2.42            | 42.31                      | 181.07 ab                | 708.40                   | 3.19                     | 38.42               | 0.383 ab          |                  |
| MECH+BLR                                              | 113.20            | 256.25                 | 5.89                 | 179.78          | 1.63            | 43.39                      | 147.89 b                 | 560.57                   | 2.37                     | 30.21               | 0.347 ab          |                  |
| OPTI                                                  | 214.76            | 334.20                 | 7.22                 | 217.88          | 2.83            | 47.08                      | 181.39 ab                | 832.65                   | 3.18                     | 44.47               | 0.597 a           |                  |
| Gregoire                                              | 107.88            | 241.03                 | 6.31                 | 165.90          | 1.81            | 43.77                      | 140.27 b                 | 503.50                   | 2.10                     | 26.80               | 0.277 b           |                  |
| Pr > F                                                | 0.338             | 0.322                  | 0.593                | 0.530           | 0.555           | 0.970                      | 0.029                    | 0.107                    | 0.117                    | 0.146               | 0.023             |                  |
| Significance                                          | NS <sup>c</sup>   | NS                     | NS                   | NS              | NS              | NS                         | *                        | NS                       | NS                       | NS                  | *                 |                  |
| Alcohols, norisoprenoids, and miscellaneous compounds |                   |                        |                      |                 |                 |                            |                          |                          |                          |                     |                   |                  |
| Harvest technology                                    | Isobutanol (mg/L) | Isoamyl alcohol (mg/L) | Hexanol              | Heptanol        | Octanol         | Phenylethyl alcohol (mg/L) | Diethyl succinate        | β-Damascenone            | α-Ionone                 | β-Ionone            | Methyl salicylate | Ethyl salicylate |
| HH                                                    | 256.55            | 304.37                 | 1793.98              | 168.42          | 36.58           | 53.73                      | 6757.91                  | 5.64 b                   | 0.675                    | 0.305               | 2.47              | 0.390 b          |
| MECH                                                  | 159.86            | 266.06                 | 2182.39              | 178.25          | 45.51           | 46.53                      | 12 839.44                | 7.37 ab                  | 0.950                    | 0.277               | 8.54              | 1.28 a           |
| MECH+BLR                                              | 127.20            | 216.23                 | 1608.69              | 133.84          | 32.44           | 37.52                      | 9942.42                  | 6.70 ab                  | 0.603                    | 0.270               | 6.42              | 1.18 a           |
| OPTI                                                  | 173.21            | 310.74                 | 2398.27              | 167.37          | 55.91           | 57.99                      | 12 221.67                | 11.42 a                  | 0.967                    | 0.180               | 18.35             | 0.400 b          |
| Gregoire                                              | 135.06            | 215.32                 | 1685.06              | 154.60          | 31.64           | 38.02                      | 10 212.02                | 6.03 ab                  | 0.477                    | 0.287               | 2.43              | 0.350 b          |
| Pr > F                                                | 0.138             | 0.513                  | 0.571                | 0.890           | 0.214           | 0.376                      | 0.322                    | 0.036                    | 0.055                    | 0.114               | 0.419             | < 0.0001         |
| Significance                                          | NS                | NS                     | NS                   | NS              | NS              | NS                         | NS                       | *                        | NS                       | NS                  | NS                | ****             |
| Terpenes and methoxy-pyrazines                        |                   |                        |                      |                 |                 |                            |                          |                          |                          |                     |                   |                  |
| Harvest technology                                    | Linalool          | cis-Linalool oxide     | trans-Linalool oxide | Geraniol        | Nerol           | Nerolidol                  | Nerol oxide              | Citronellol              | α-Citral                 | β-Citral            | cis-Rose oxide    | trans-Rose oxide |
| HH                                                    | 1.06              | 1.47                   | 0.410                | 14.94           | 7.92 ab         | 0.245                      | 0.220                    | 2.78 c                   | 1.93                     | 3.63                | 0.185 b           | 0.065 b          |
| MECH                                                  | 1.29              | 5.29                   | 1.67                 | 14.88           | 13.83 a         | 0.297                      | 0.303                    | 15.51 a                  | 3.23                     | 4.19                | 0.437 a           | 0.153 a          |
| MECH+BLR                                              | 1.14              | 4.56                   | 1.36                 | 11.81           | 10.51 ab        | 0.267                      | 0.227                    | 14.08 ab                 | 2.57                     | 3.52                | 0.383 ab          | 0.140 ab         |
| OPTI                                                  | 1.25              | 2.07                   | 10.21                | 10.69           | 9.93 ab         | 0.380                      | 0.310                    | 12.07 ab                 | 3.58                     | 4.32                | 0.290 ab          | 0.100 ab         |
| Gregoire                                              | 0.540             | 1.84                   | 0.557                | 6.49            | 5.78 b          | 0.200                      | 0.157                    | 7.24 bc                  | 2.68                     | 3.55                | 0.220 b           | 0.080 b          |
| Pr > F                                                | 0.100             | 0.089                  | 0.511                | 0.057           | 0.050           | 0.154                      | 0.213                    | 0.006                    | 0.175                    | 0.770               | 0.009             | 0.015            |
| Significance                                          | NS                | NS                     | NS                   | NS              | *               | NS                         | NS                       | **                       | NS                       | NS                  | **                | *                |
| Harvest technology                                    | α-Terpineol       | Terpinolene            | γ-Terpinene          | Limonene        | Myrcene         | Eugenol                    | IPMP <sup>d</sup> (ng/L) | IBMP <sup>d</sup> (ng/L) | SBMP <sup>d</sup> (ng/L) |                     |                   |                  |
| HH                                                    | 19.93             | 0.015                  | 0.010                | 0.085           | 2.52            | 0.125 b                    | 2.65 a                   | 3.35                     | 1.25                     |                     |                   |                  |
| MECH                                                  | 19.28             | 0.010                  | 0.010                | 0.107           | 1.30            | 2.74 a                     | 1.27 b                   | 2.93                     | 2.40                     |                     |                   |                  |
| MECH+BLR                                              | 13.46             | 0.017                  | 0.010                | 0.107           | 2.05            | 3.31 a                     | 1.63 b                   | 3.03                     | 1.40                     |                     |                   |                  |
| OPTI                                                  | 17.99             | 0.017                  | 0.007                | 0.160           | 1.87            | 1.21 ab                    | 1.80 b                   | 2.37                     | 1.30                     |                     |                   |                  |
| Gregoire                                              | 8.88              | 0.010                  | 0.000                | 0.060           | 0.950           | 0.480 b                    | 1.30 b                   | 3.17                     | 1.43                     |                     |                   |                  |
| Pr > F                                                | 0.286             | 0.234                  | 0.204                | 0.082           | 0.198           | 0.004                      | 0.017                    | 0.392                    | 0.226                    |                     |                   |                  |
| Significance                                          | NS                | NS                     | NS                   | NS              | NS              | **                         | *                        | NS                       | NS                       |                     |                   |                  |

<sup>a</sup>HH, hand harvest; MECH, mechanical harvest; MECH+BLR, mechanical harvest plus preharvest full canopy leaf removal; OPTI, mechanically harvested using a Braud-New Holland optical sorting harvester; Gregoire, mechanical harvest with Gregoire GL8 with optical sorting.

<sup>b</sup>Means followed by different letters are significantly different at  $p < 0.05$ , Duncan's multiple range test.

<sup>c</sup>\*, \*\*, \*\*\*\*, NS: significant at  $p < 0.05$ , 0.01, 0.0001, or not significant, respectively.

<sup>d</sup>IPMP, isopropyl methoxy-pyrazine; IBMP, isobutyl methoxy-pyrazine; SBMP, *sec*-butyl methoxy-pyrazine.

**Supplemental Data for:**

Lan Y, Wang J, Aubie E, Crombleholme M and Reynolds A. 2022. Effects of frozen materials other than grapes on red wine aroma compounds. Impacts of harvest technologies. *Am J Enol Vitic* 73:134-146. doi: 10.5344/ajev.2022.22006

**Supplemental Table 3** Effect of harvest technology on Ontario Cabernet franc aroma compounds, 2019. Concentrations are in µg/L unless otherwise specified.

| Esters                                                |                       |                        |                      |                 |                 |                            |                   |                        |               |                     |                   |                  |
|-------------------------------------------------------|-----------------------|------------------------|----------------------|-----------------|-----------------|----------------------------|-------------------|------------------------|---------------|---------------------|-------------------|------------------|
| Harvest technology <sup>a</sup>                       | Ethyl isobutyrate     | Ethyl hexanoate        | Ethyl heptanoate     | Ethyl octanoate | Ethyl nonanoate | Ethyl decanoate            | Isobutyl acetate  | Isoamyl acetate        | Hexyl acetate | Phenylethyl acetate | Isoamyl hexanoate |                  |
| HH                                                    | 452.82 a <sup>b</sup> | 1538.83 a              | 11.01 abc            | 402.49 ab       | 3.15 a          | 62.38 ab                   | 496.62 ab         | 2480.06 a              | 3.88 b        | 60.17 b             | 1.49 ab           |                  |
| MECH                                                  | 314.74 bcd            | 1369.95 a              | 11.79 ab             | 450.06 a        | 1.31 c          | 92.28 ab                   | 413.02 bc         | 2025.51 ab             | 4.06 b        | 46.02 bc            | 1.81 a            |                  |
| MECH+BLR                                              | 278.72 cd             | 1300.38 a              | 12.75 a              | 368.69 ab       | 2.45 ab         | 51.22 ab                   | 391.00 c          | 2173.92 ab             | 4.37 b        | 49.95 bc            | 1.37 ab           |                  |
| OPTI                                                  | 354.79 bc             | 1336.51 a              | 8.30 bc              | 373.83 ab       | 1.47 c          | 69.56 ab                   | 429.91 bc         | 1900.31 b              | 4.10 b        | 42.85 c             | 1.61 ab           |                  |
| Gregoire                                              | 387.39 ab             | 1351.86 a              | 13.68 a              | 400.97 ab       | 2.87 ab         | 96.86 a                    | 476.70 abc        | 2228.60 ab             | 4.16 b        | 50.53 bc            | 1.69 a            |                  |
| MECH + OS                                             | 266.03 d              | 924.09 b               | 7.128 c              | 222.79 b        | 2.18 bc         | 34.74 b                    | 550.85 a          | 2520.69 a              | 8.45 a        | 103.97 a            | 0.916 b           |                  |
| Pr > F                                                | <0.0001               | <0.0001                | 0.001                | 0.044           | <0.0001         | 0.041                      | 0.001             | 0.012                  | <0.0001       | <0.0001             | 0.030             |                  |
| Significance                                          | ****c                 | ****                   | ***                  | *               | ****            | *                          | ***               | *                      | ****          | ****                | *                 |                  |
| Alcohols, norisoprenoids, and miscellaneous compounds |                       |                        |                      |                 |                 |                            |                   |                        |               |                     |                   |                  |
| Harvest technology                                    | Isobutanol (mg/L)     | Isoamyl alcohol (mg/L) | Hexanol              | Heptanol        | Octanol         | Phenylethyl alcohol (mg/L) | Diethyl succinate | β-Damascenone α-Ionone | β-Ionone      | Methyl salicylate   | Ethyl salicylate  |                  |
| HH                                                    | 739.66                | 2742.82                | 11 168.75            | 262.87          | 120.04          | 147.86                     | 4399.54 d         | 14.38                  | 1.68 a        | 0.418               | 13.99 ab          | 0.388 bc         |
| MECH                                                  | 623.31                | 2168.01                | 10 882.6             | 286.86          | 104.52          | 108.46                     | 25 668.81 ab      | 14.58                  | 1.58 ab       | 0.417               | 16.47 a           | 0.506 ab         |
| MECH+BLR                                              | 593.28                | 2162.00                | 10 748.53            | 322.36          | 113.88          | 123.36                     | 24 258.58 ab      | 12.12                  | 1.38 b        | 0.387               | 13.66 ab          | 0.561 a          |
| OPTI                                                  | 840.78                | 2682.74                | 14 031.77            | 247.47          | 88.17           | 121.23                     | 18 963.25 bc      | 11.58                  | 1.11 c        | 0.338               | 10.21 c           | 0.257 de         |
| Gregoire                                              | 833.08                | 2681.06                | 12 297.01            | 329.78          | 117.65          | 131.75                     | 30 929.99 a       | 12.36                  | 1.64 a        | 0.407               | 12.39 bc          | 0.275 cd         |
| MECH + OS                                             | 593.49                | 2127.57                | 13 932.05            | 292.10          | 128.13          | 192.85                     | 13 878.61 c       | 12.43                  | 0.832 d       | 0.339               | 6.72 d            | 0.137 e          |
| Pr > F                                                | 0.182                 | 0.240                  | 0.232                | 0.130           | 0.080           | 0.097                      | <0.0001           | 0.098                  | <0.0001       | 0.192               | <0.0001           | <0.0001          |
| Significance                                          | NS                    | NS                     | NS                   | NS              | NS              | NS                         | ****              | NS                     | ****          | NS                  | ****              | ****             |
| Terpenes                                              |                       |                        |                      |                 |                 |                            |                   |                        |               |                     |                   |                  |
| Harvest technology                                    | Linalool              | cis-Linalool oxide     | trans-Linalool oxide | Geraniol        | Nerol           | Nerolidol                  | Nerol oxide       | Citronellol            | α-Citral      | β-Citral            | cis-Rose oxide    | trans-Rose oxide |
| HH                                                    | 8.71 a                | 13.28 a                | 6.76                 | 26.10           | 13.01 b         | 0.262                      | 0.307 bc          | 17.14 a                | 4.13 a        | 3.31                | 0.276 b           | 0.066 b          |
| MECH                                                  | 7.48 abc              | 12.24 ab               | 6.35                 | 25.91           | 22.29 a         | 0.172                      | 0.417 ab          | 12.82 b                | 4.09 ab       | 2.59                | 0.434 a           | 0.107 a          |
| MECH+BLR                                              | 7.25 bc               | 13.44 a                | 8.76                 | 26.97           | 13.59 b         | 0.202                      | 0.449 a           | 14.13 b                | 4.16 a        | 3.53                | 0.514 a           | 0.139 a          |
| OPTI                                                  | 7.23 bc               | 9.39 b                 | 3.37                 | 25.46           | 11.40 b         | 0.116                      | 0.253 c           | 14.43 ab               | 2.99 b        | 2.89                | 0.195 b           | 0.052 b          |
| Gregoire                                              | 8.01 ab               | 11.64 ab               | 3.59                 | 28.02           | 12.43 b         | 0.150                      | 0.393 ab          | 14.75 ab               | 3.91 ab       | 2.89                | 0.247 b           | 0.055 b          |
| MECH + OS                                             | 6.51 c                | 8.39 b                 | 5.95                 | 23.39           | 10.84 b         | 0.160                      | 0.244 c           | 13.85 b                | 3.33 ab       | 3.16                | 0.219 b           | 0.049 b          |
| Pr > F                                                | 0.002                 | 0.003                  | 0.092                | 0.548           | <0.0001         | 0.133                      | <0.0001           | 0.010                  | 0.012         | 0.169               | <0.0001           | <0.0001          |
| Significance                                          | **                    | **                     | NS                   | NS              | ****            | NS                         | ****              | **                     | *             | NS                  | ****              | ****             |
| Harvest technology                                    | α-Terpineol           | Terpinolene            | γ-Terpinene          | Limonene        | Myrcene         | Eugenol                    |                   |                        |               |                     |                   |                  |
| HH                                                    | 85.35 bc              | 0.025 a                | 0.020 a              | 0.120           | 3.96            | 2.15 ab                    |                   |                        |               |                     |                   |                  |
| MECH                                                  | 111.27 a              | 0.026 b                | 0.012 b              | 0.098           | 2.38            | 2.17 ab                    |                   |                        |               |                     |                   |                  |
| MECH+BLR                                              | 94.86 b               | 0.033 a                | 0.011 b              | 0.198           | 2.38            | 2.44 a                     |                   |                        |               |                     |                   |                  |
| OPTI                                                  | 92.67 b               | 0.024 b                | 0.011 b              | 0.116           | 1.99            | 1.72 cd                    |                   |                        |               |                     |                   |                  |
| Gregoire                                              | 78.65 cd              | 0.033 a                | 0.013 b              | 0.116           | 3.23            | 1.89 bc                    |                   |                        |               |                     |                   |                  |
| MECH + OS                                             | 71.19 d               | 0.027 b                | 0.010 b              | 0.087           | 1.81            | 1.47 d                     |                   |                        |               |                     |                   |                  |
| Pr > F                                                | <0.0001               | 0.050                  | 0.002                | 0.270           | 0.161           | <0.0001                    |                   |                        |               |                     |                   |                  |
| Significance                                          | ****                  | *                      | **                   | NS              | NS              | ****                       |                   |                        |               |                     |                   |                  |

<sup>a</sup>HH, hand harvest; MECH, mechanical harvest; MECH+BLR, mechanical harvest plus preharvest full canopy leaf removal; OPTI, mechanically harvested using a Braud-New Holland optical sorting harvester; Gregoire, mechanical harvest with Gregoire GL8 with optical sorting; MECH + OS, mechanical harvest with in-winery optical sorting.

<sup>b</sup>Means followed by different letters are significantly different at  $p < 0.05$ , Duncan's multiple range test.

<sup>c</sup>\*, \*\*, \*\*\*, \*\*\*\*, NS: significant at  $p \leq 0.05, 0.01, 0.001, 0.0001$ , or not significant, respectively.

**Supplemental Data for:**

Lan Y, Wang J, Aubie E, Crombleholme M and Reynolds A. 2022. Effects of frozen materials other than grapes on red wine aroma compounds. Impacts of harvest technologies. *Am J Enol Vitic* 73:134-146. doi: 10.5344/ajev.2022.22006

**Supplemental Table 4** Basic wine composition variables of Ontario Cabernet franc wines with different harvest strategies, 2017 to 2019. TA, titratable acidity.

| Vintage     | Harvest strategy <sup>a</sup> | pH                   | TA (g/L) | Color    | Total phenols (mg/L) | Anthocyanins (mg/L) | Ethanol (%) |
|-------------|-------------------------------|----------------------|----------|----------|----------------------|---------------------|-------------|
| <b>2017</b> | HH (Control)                  | 3.66 ab <sup>b</sup> | 6.79 a   | 0.379 ab | 890.07 a             | 741.42 ab           | 12.42 ab    |
|             | Braud OPTI                    | 3.56 b               | 6.62 ab  | 0.425 ab | 978.43 a             | 879.01 a            | 12.08 b     |
|             | MECH+OPTI                     | 3.67 ab              | 6.33 abc | 0.468 a  | 1349.22 a            | 947.81 a            | 12.76 ab    |
|             | MECH+BLR                      | 3.74 a               | 5.89 c   | 0.295 b  | 804.87 a             | 497.78 b            | 12.99 a     |
|             | MECH                          | 3.70 ab              | 5.99 bc  | 0.434 ab | 937.41 a             | 627.74 ab           | 12.63 ab    |
| <b>2018</b> | HH (Control)                  | 4.22 ab              | 4.44 a   | 0.066 a  | 230.69 a             | 52.83 a             | ---         |
|             | Gregoire                      | 4.24 a               | 4.35 a   | 0.097 a  | 176.23 ab            | 36.05 ab            | ---         |
|             | Braud OPTI                    | 4.13 b               | 4.33 a   | 0.058 a  | 114.68 c             | 24.23 b             | ---         |
|             | MECH+BLR                      | 4.28 a               | 4.04 b   | 0.072 a  | 168.34 b             | 26.41 ab            | ---         |
|             | MECH                          | 4.22 ab              | 4.36 a   | 0.111 a  | 202.12 ab            | 34.16 ab            | ---         |
| <b>2019</b> | HH (Control)                  | 3.90 a               | 6.07 a   | 0.649 a  | 1391.99 a            | 104.43 b            | ---         |
|             | Gregoire                      | 3.81 bc              | 5.89 ab  | 0.509 a  | 1385.68 a            | 174.42 a            | ---         |
|             | Braud OPTI                    | 3.82 bc              | 5.71 b   | 0.539 a  | 1000.57 a            | 183.29 a            | ---         |
|             | MECH+OPTI                     | 3.73 d               | 6.10 a   | 0.550 a  | 1395.15 a            | 178.43 a            | ---         |
|             | MECH+BLR                      | 3.87 ab              | 5.79 b   | 0.572 a  | 1177.34 a            | 171.10 a            | ---         |
|             | MECH                          | 3.79 cd              | 5.65 b   | 0.549 a  | 1297.29 a            | 182.01 a            | ---         |

<sup>a</sup>HH, hand harvest; Gregoire, mechanical harvest with Gregoire GL8 with optical sorting; Braud OPTI, mechanically harvested using a Braud-New Holland optical sorting harvester; MECH + OPTI, mechanical harvest with in-winery optical sorting; MECH+BLR, mechanical harvest plus preharvest full canopy leaf removal; MECH, mechanical harvest.

<sup>b</sup>Means within years followed by different letters are significantly different at  $p < 0.05$ , Duncan's multiple range test.

**Supplemental Data for:**

Lan Y, Wang J, Aubie E, Crombleholme M and Reynolds A. 2022. Effects of frozen materials other than grapes on red wine aroma compounds. Impacts of harvest technologies. *Am J Enol Vitic* 73:134-146. doi: 10.5344/ajev.2022.22006

**Supplemental Table 5** Basic wine composition variables of Ontario Cabernet franc and Cabernet Sauvignon wines with frost treatments, 2018 to 2019. TA, titratable acidity.

| Vintage | Cultivar           | Treatment    | pH    | TA (g/L) | Color | Total phenols (mg/L) | Anthocyanins (mg/L) |
|---------|--------------------|--------------|-------|----------|-------|----------------------|---------------------|
| 2018    | Cabernet franc     | Before frost | 4.39  | 4.30     | 0.069 | 235.99               | 36.35               |
|         |                    | After frost  | 4.22  | 4.44     | 0.066 | 230.77               | 52.83               |
|         |                    | Pr > F       | 0.045 | 0.080    | 0.655 | 0.919                | 0.658               |
|         |                    | Significance | *a    | NS       | NS    | NS                   | NS                  |
|         | Cabernet Sauvignon | Before frost | 4.11  | 5.19     | 0.119 | 287.03               | 45.98               |
|         |                    | After frost  | 4.14  | 5.21     | 0.086 | 217.27               | 37.02               |
|         |                    | Pr > F       | 0.290 | 0.936    | 0.231 | 0.232                | 0.324               |
|         |                    | Significance | NS    | NS       | NS    | NS                   | NS                  |
| 2019    | Cabernet franc     | Before frost | 3.80  | 5.85     | 0.429 | 1256.26              | 156.35              |
|         |                    | After frost  | 3.90  | 6.07     | 0.649 | 1391.99              | 104.43              |
|         |                    | Pr > F       | 0.105 | 0.203    | 0.105 | 0.472                | 0.243               |
|         |                    | Significance | NS    | NS       | NS    | NS                   | NS                  |
|         | Cabernet Sauvignon | Before frost | 3.70  | 6.35     | 0.778 | 1606.65              | 256.01              |
|         |                    | After frost  | 3.79  | 5.92     | 0.763 | 1527.73              | 266.24              |
|         |                    | Pr > F       | 0.005 | 0.006    | 0.493 | 0.602                | 0.603               |
|         |                    | Significance | **    | **       | NS    | NS                   | NS                  |

<sup>a\*</sup>, <sup>\*\*</sup>, NS: significant at  $p \leq 0.05$ , 0.01, or not significant, respectively.

**Supplemental Data for:**

Lan Y, Wang J, Aubie E, Crombleholme M and Reynolds A. 2022. Effects of frozen materials other than grapes on red wine aroma compounds. Impacts of harvest technologies. *Am J Enol Vitic* 73:134-146 doi: 10.5344/ajev.2022.22006

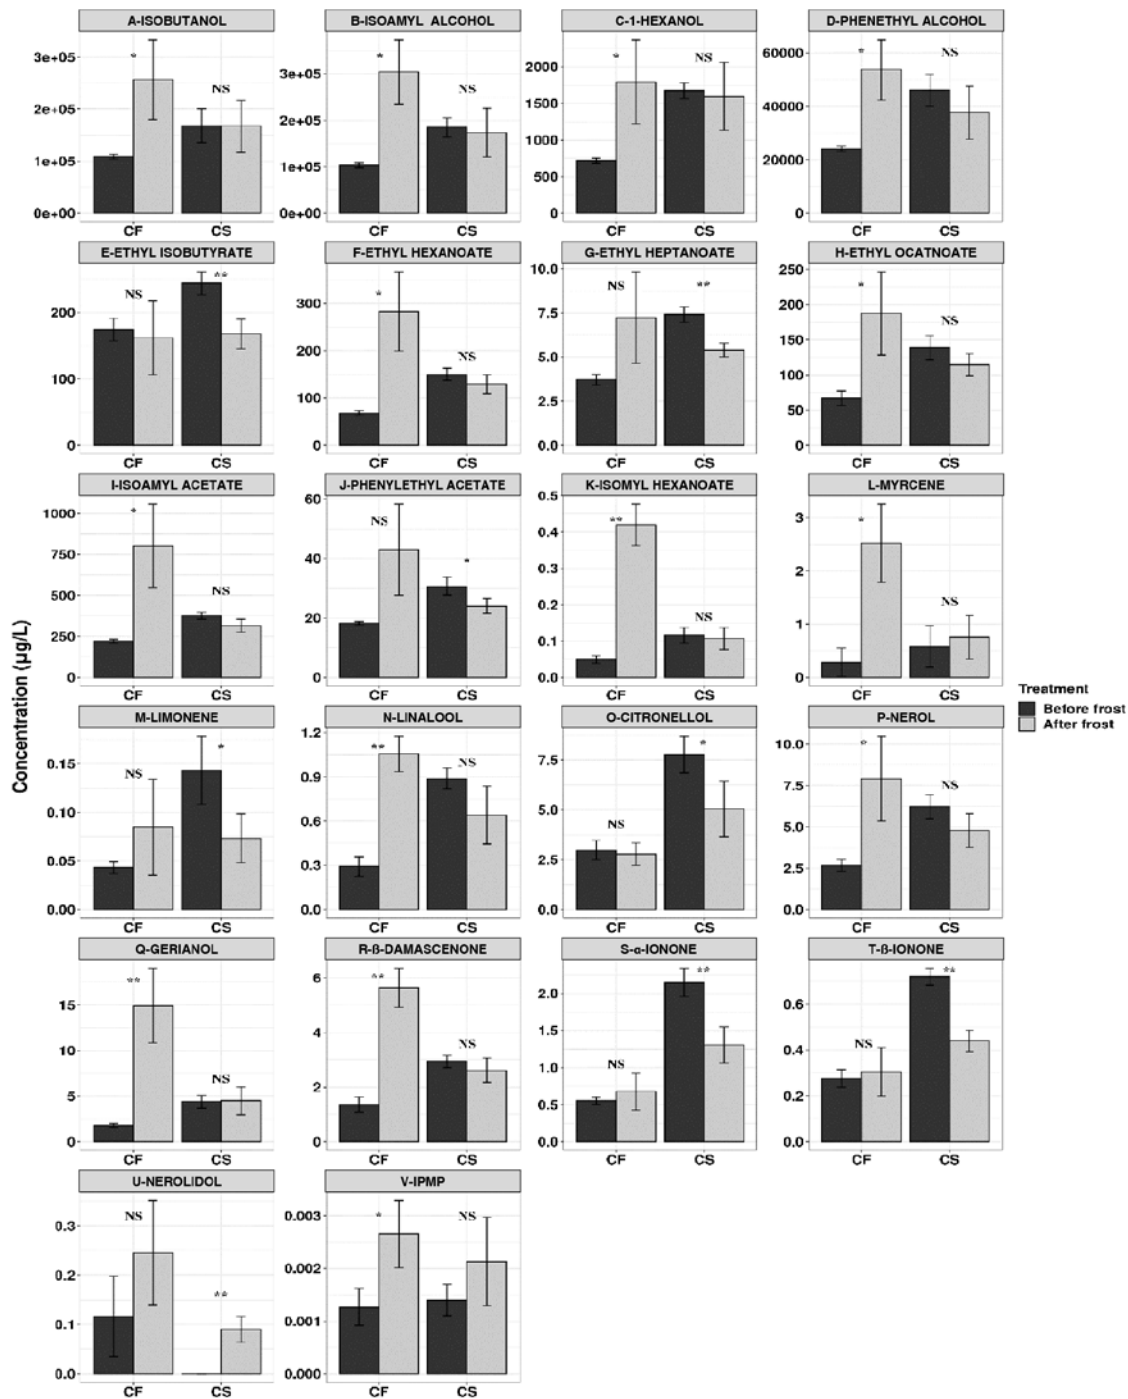

**Supplemental Figure 1** Effect of killing frost on wine composition of Ontario Cabernet franc (CF) and Cabernet Sauvignon (CS), 2018. IPMP, isopropyl methoxypyrazine. \*, \*\*, NS: significant at  $p < 0.05$ ,  $0.01$ , or not significant, respectively.

**Supplemental Data for:**

Lan Y, Wang J, Aubie E, Crombleholme M and Reynolds A. 2022. Effects of frozen materials other than grapes on red wine aroma compounds. Impacts of harvest technologies. Am J Enol Vitic 73:134-146. doi: 10.5344/ajev.2022.22006

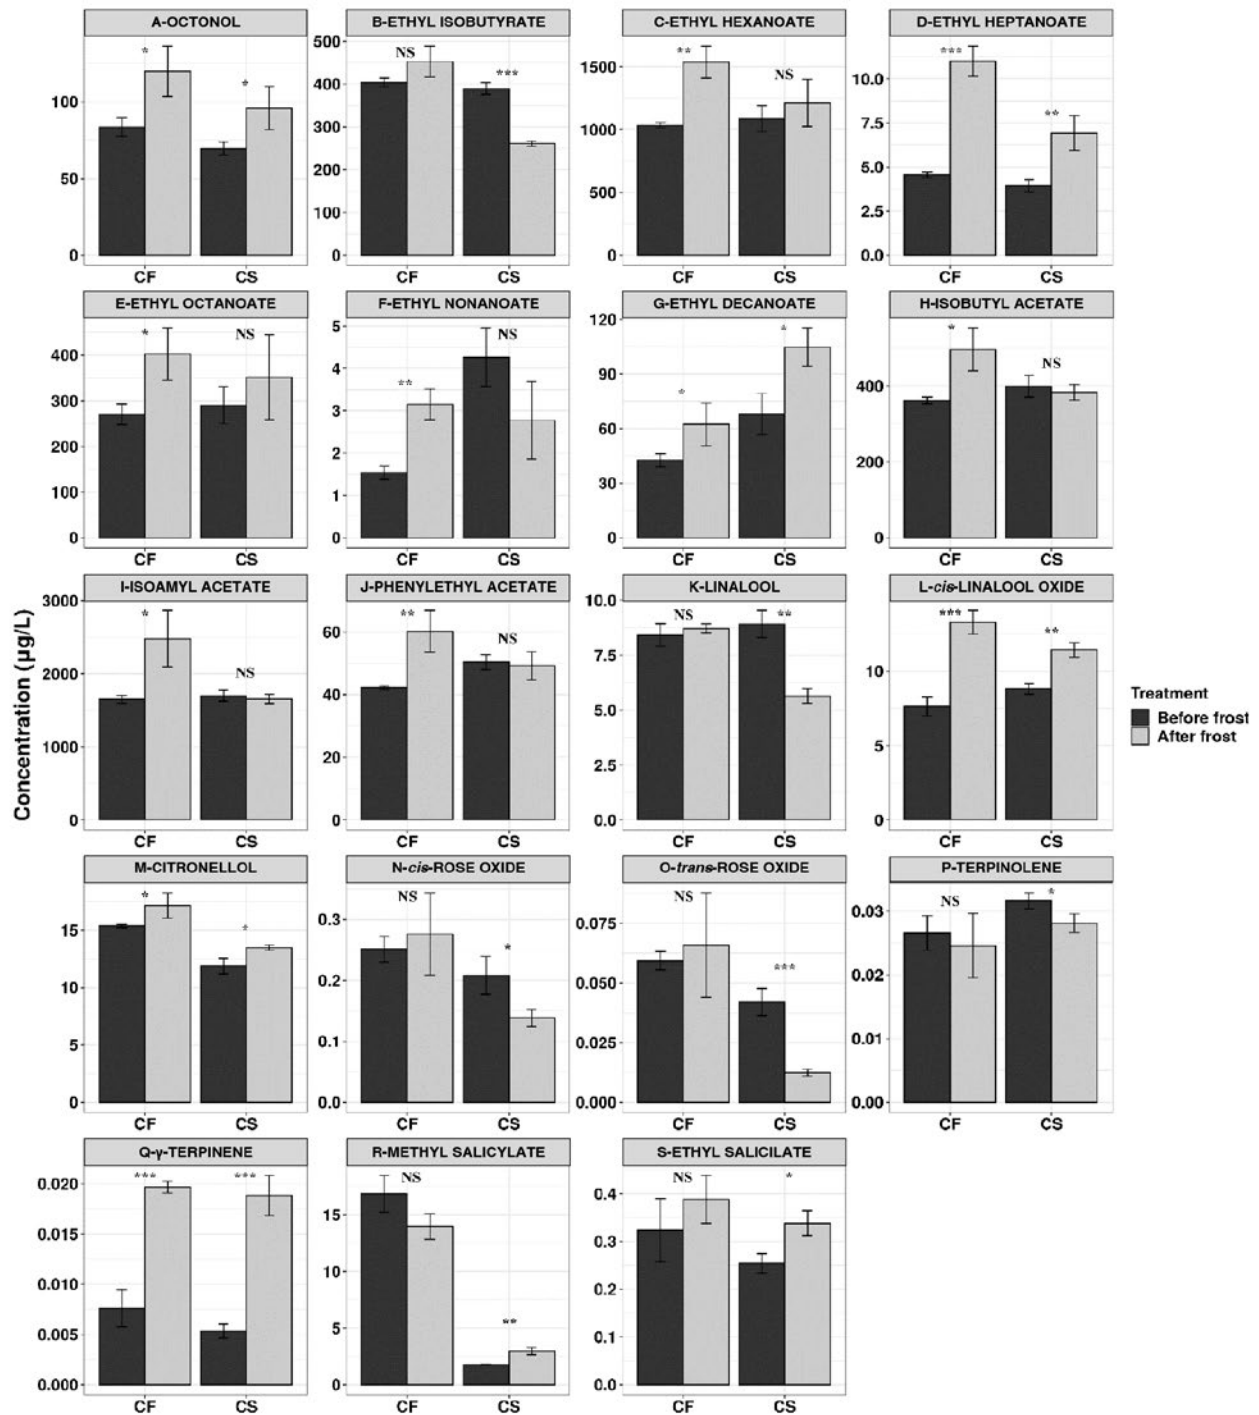

**Supplemental Figure 2** Effect of killing frost on wine composition of Ontario Cabernet franc (CF) and Cabernet Sauvignon (CS), 2019. \*, \*\*, \*\*\*, NS: significant at  $p < 0.05$ , 0.01, 0.001, or not significant, respectively.
